# Supplementary material for: Natural Products-Based Drug Design against SARS-CoV-2 Mpro 3CLpro
Source: MDPI journal article supplement (doi:10.3390/ijms222111739), 2021-10-29
Supplement: s1 [file s1]

# Natural Products-based drug design against SARS-CoV-2 Mpro 3CLpro

Rai C. Silva<sup>1,2\*</sup>, Humberto F. Freitas<sup>3,4</sup>, Joaquín M. Campos<sup>5,6</sup>, Njogu M. Kimani<sup>7</sup>, Carlos H. T. P. Silva<sup>2</sup>, Rosivaldo S. Borges<sup>1</sup>, Samuel S. R. Pita<sup>4\*</sup>, Cleidson B. R. Santos<sup>1,8\*</sup>

<sup>1</sup>Graduate Program on Medicinal Chemistry and Molecular Modeling, Institute of Health science, Federal University of Pará. Augusto Corrêa, 01 - Guamá, Belém, 66075-110, PA, Brazil; raics@usp.br (R.C.S.); lqfmed@gmail.com (R.S.B);

<sup>2</sup>Departamento de Química, Faculdade de Filosofia, Ciências e Letras de Ribeirão Preto, Universidade de São Paulo, Ribeirão Preto 14040-901, SP, Brazil; tomich@fcfrp.usp.br (C.H.T.P.S.)

<sup>3</sup>Graduate Program on Pharmacy (PPGFAR-UFBA), Pharmacy College, Federal University of Bahia, Salvador, Bahia, Brazil; humbarato@gmail.com (H.F.F.);

<sup>4</sup>Laboratory of Bioinformatics and Molecular Modeling (LaBiMM), Federal University of Bahia, Av. Barão de Jeremoabo, 147, Pharmacy College, Ondina, Salvador, 40170-115, BA, Brazil; samuel.pita@ufba.br (S.S.R.P.)

<sup>5</sup>Department of Pharmaceutical and Organic Chemistry, Faculty of Pharmacy, Campus of Cartuja, University of Granada, 18071Granada, Spain; jmcampos@ugr.es (J.M.C)

<sup>6</sup>Biosanitary Institute of Granada (ibs.GRANADA), University of Granada, 18071-Granada, Spain.

<sup>7</sup>Department of Physical Sciences, University of Embu, P. O. BOX, Embu, 6-60100, Kenya; njogu.mark@embuni.ac.ke (N.M.K)

<sup>8</sup>Laboratory of Modeling and Computational Chemistry, Department of Biological and Health Sciences, Federal University of Amapá, 68902-280 Macapá, AP, Brazil; breno@unifap.br (C.B.R.S.)

\* Corresponding author: raics@usp.br (R.C.S); breno@unifap.br (C.B.R.S); samuel.pita@ufba.br (S.S.R.P)

## Supplementary Information

ORCIDS ID's:

RCS <https://orcid.org/0000-0003-1774-4164>; raics@usp.br

HFF <https://orcid.org/0000-0003-3040-9694>; humbarato@gmail.com

JMC <https://orcid.org/0000-0002-9035-8123>; jmcampos@ugr.es

NMK <https://orcid.org/0000-0002-5171-1940>; njogu.mark@embuni.ac.ke

CHTPS <https://orcid.org/0000-0001-6049-3650>; tomich@fcfrp.usp.br

RSB <https://orcid.org/0000-0003-4072-7573>; lqfmed@gmail.com

SSRP <https://orcid.org/0000-0003-4053-8721>; samuel.pita@ufba.br

CBRS <https://orcid.org/0000-0002-0271-335X>; breno@unifap.br

Figure S1: **RZS** (crystallographic ligand) docked on SARS-CoV-2 main protease calculated by SeeSAR. **Mpro** is shown as a cartoon (blue) with its main interacting residues (blue sticks), **RZS** is shown in magenta sticks and polar interactions are depicted as yellow dashed lines. This image was generated by educational pymol 2.4.1 [59].

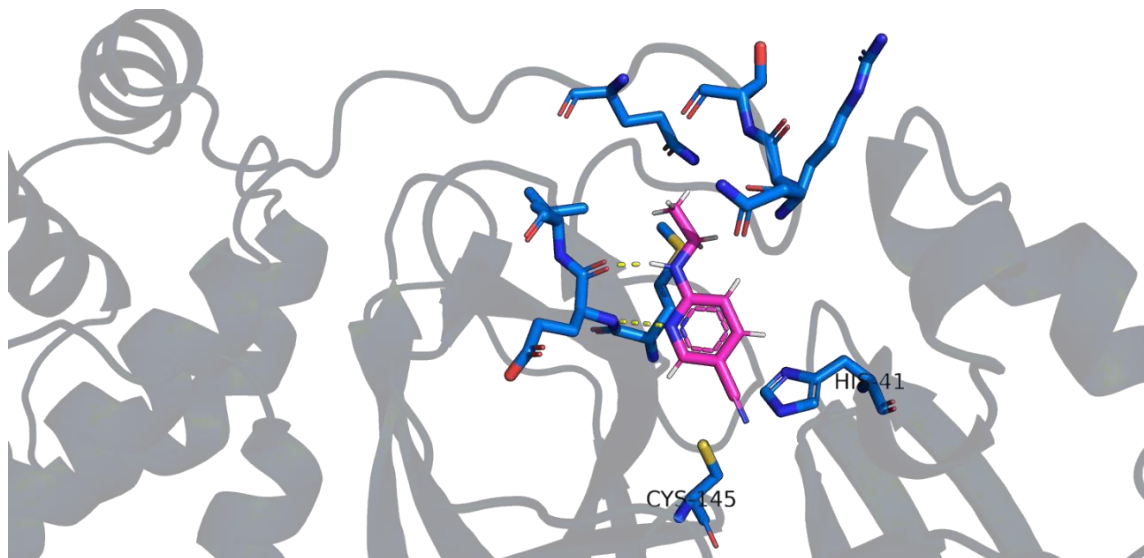

Figure S2: **E-64** (positive control) docked on SARS-CoV-2 Mpro calculated by SeeSAR. **Mpro** are shown as cartoon (blue) with its main interacting residues (blue sticks), **E-64** is shown in orange sticks and polar interactions are depicted as yellow dashed lines. This image was generated by educational pymol 2.4.1 [59].

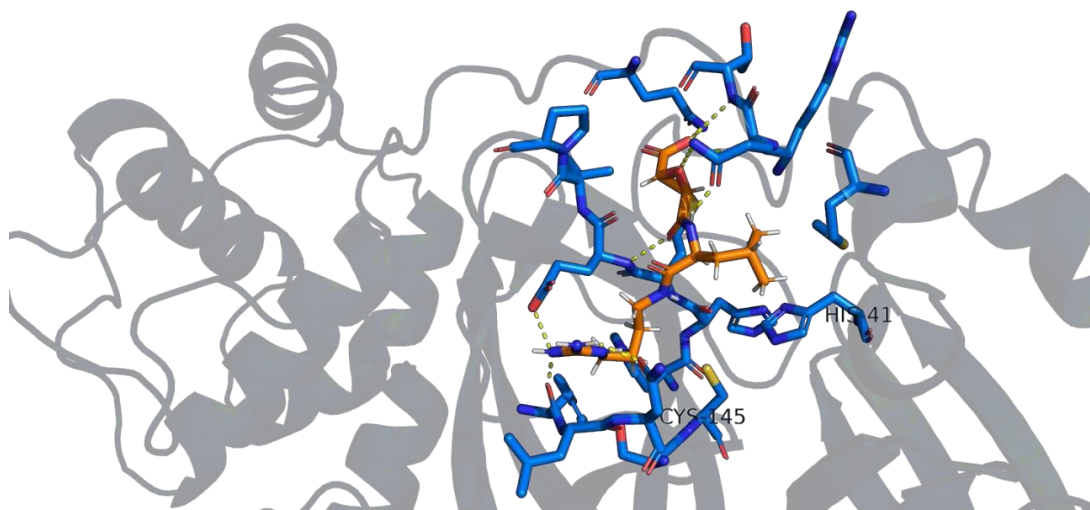

Figure S3: Better energy ranked NatProDB compound **b01** docked on SARS-CoV-2 main protease calculated by SeeSAR. **Mpro** are shown as cartoon (blue) with its main interacting residues (blue sticks), **b01** is shown in green sticks and polar interaction is depicted as yellow dashed lines. This image was generated by educational pymol 2.4.1 [59].

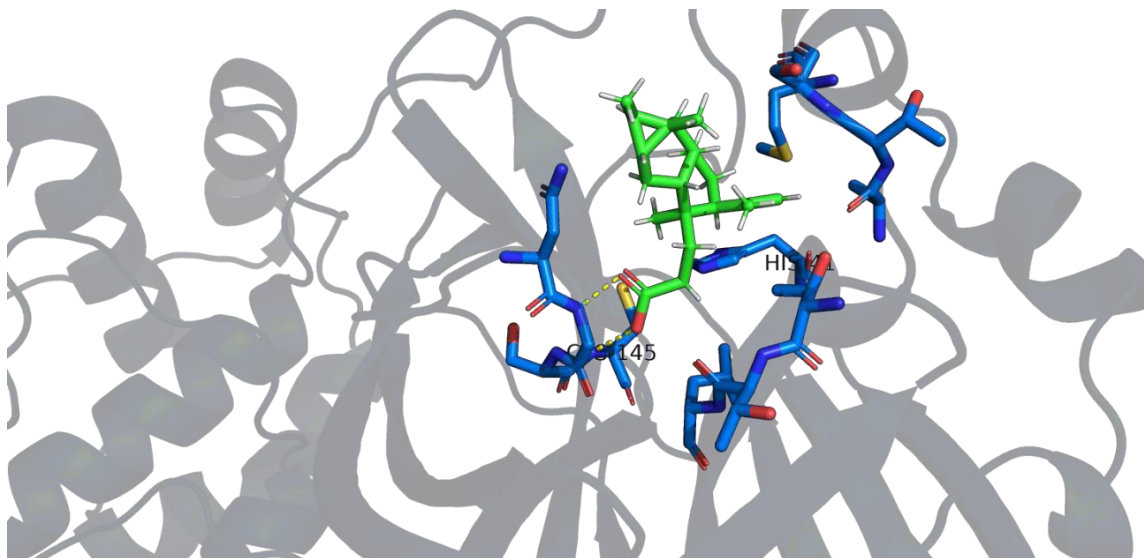

Figure S4: Second-best energy ranked of NatProDB compound **b02** docked on SARS-COV-2 Mpro calculated by seeSAR. **Mpro** are shown as cartoon (blue) with its main interacting residues (blue sticks), **b01** is shown in cyan sticks and polar interaction is depicted as yellow dashed lines. this image was generated by educational pymol 2.4.1 [59].

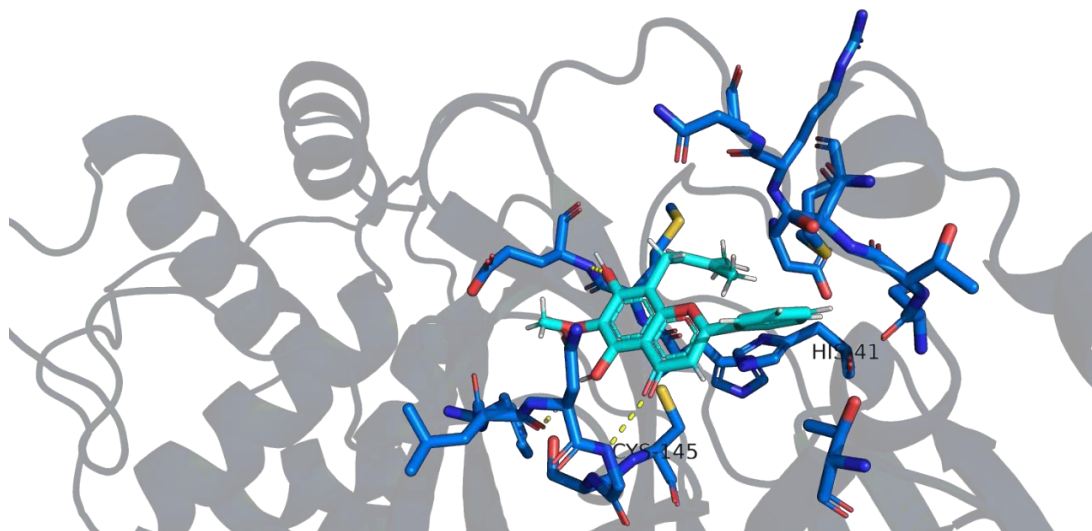

Figure S5: Molecular dynamics (MD) simulation data for main protease of SARS-CoV-2 main protease complexes generated for gromacs 5.1.4 [66- 72]. a) rmsd values (averaged mean  $\pm$  standard deviation) for each system: **apo** ( $0.31 \pm 0.03$ ), **holo** ( $0.44 \pm 0.04$ ), **E-64** ( $0.31 \pm 0.03$ ), **b01** ( $0.33 \pm 0.03$ ), **b02** ( $0.35 \pm 0.03$ ), **b03** ( $0.38 \pm 0.03$ ), **b04** ( $0.43 \pm 0.03$ ), **b05** ( $0.37 \pm 0.03$ ); b) rmsf and c) radius of gyration, both from productive phase (40-100ns).

A)

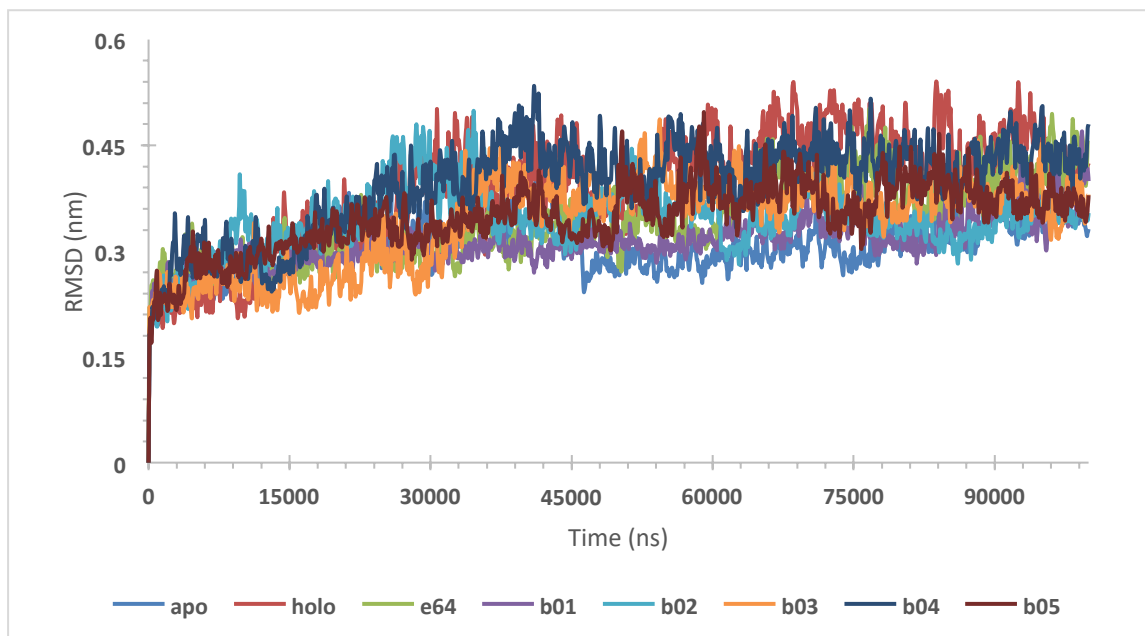

B)

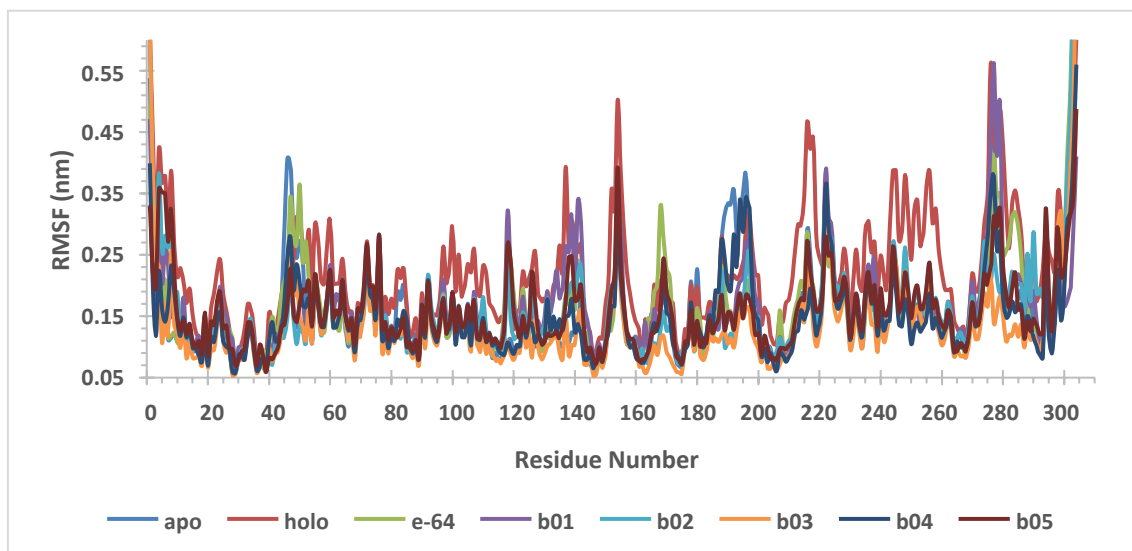

C)

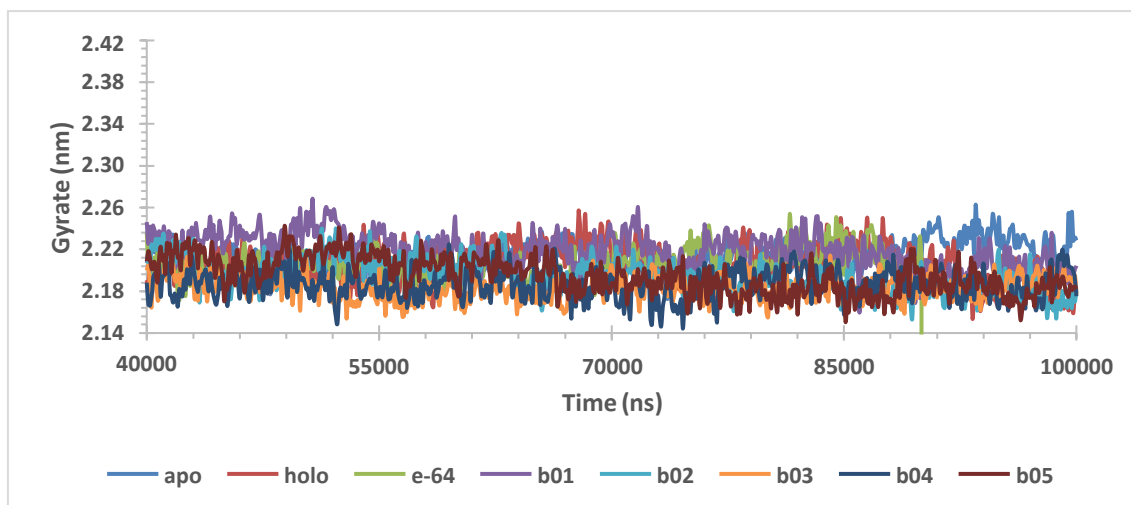

Figure S6: Productive phase (40-100ns) Secondary structure evaluation of SARS-CoV- 2 Main protease complexes by DSSP 3.1.4 [63-65] module installed on GROMACS 5.1.4 [66-72]. From upper left corner to the right: apo, holo, E-64, b01, b02, b03, b04, b05.

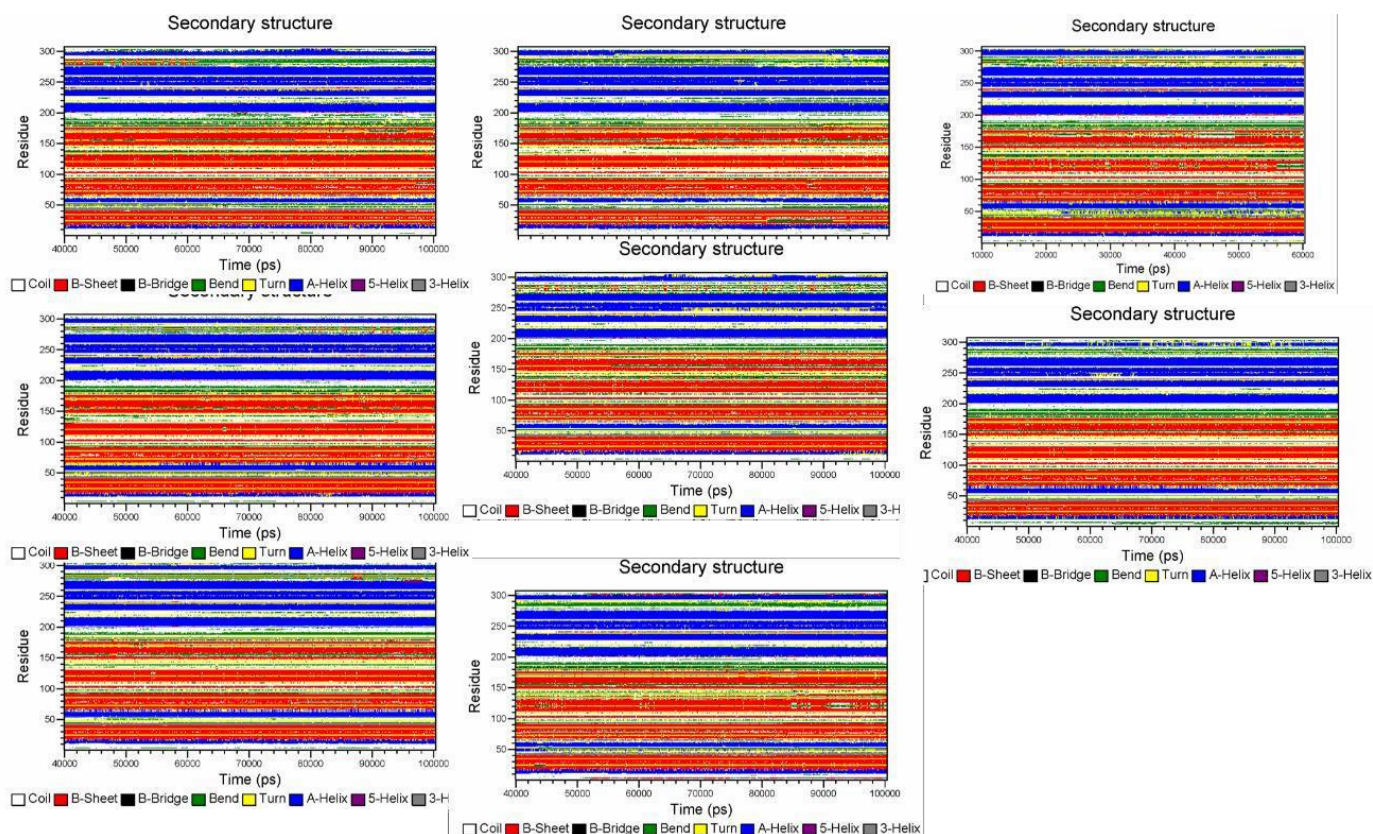

Table S1: ADMET properties calculated from QikProp<sup>TM</sup> for NatProDB compounds on SARS-CoV-2 Main protease structure.

| N <sup>o</sup> | SMILES code                                                                 | #stars <sup>a</sup> | CNS <sup>b</sup> | HOA <sup>c</sup> | Caco-2 <sup>d</sup> | log P <sup>e</sup> | PSA (Å <sup>2</sup> ) <sup>f</sup> | HBD <sup>g</sup> | HBA <sup>h</sup> | RO5 <sup>i</sup> | logKHSA <sup>j</sup> | QlogHERG <sup>k</sup> |
|----------------|-----------------------------------------------------------------------------|---------------------|------------------|------------------|---------------------|--------------------|------------------------------------|------------------|------------------|------------------|----------------------|-----------------------|
| <b>b01</b>     | <chem>C=C(C)C3CCC2CC1(C)C(C)C1CC2C3(C)CC</chem><br><chem>C(=O)O</chem>      | 1                   | -1               | 87.94            | 297.61              | 6.69               | 49.54                              | 1                | 2                | 1                | 0.84                 | -1.92                 |
| <b>b02</b>     | <chem>CC2CC(O)C1(CO)C(CO)=CCCC1C2(C)CC/C</chem><br><chem>(=C/CO)CO</chem>   | 0                   | -2               | 100.0            | 759.23              | 4.52               | 81.69                              | 5                | 5                | 0                | 0.18                 | -5.14                 |
| <b>b03</b>     | <chem>COc3cc(CCCCCc1cccc1)c2c(=O)c(=O)[nH]c2</chem><br><chem>c3OC</chem>    | 0                   | -2               | 64.56            | 304.20              | 0.15               | 70.26                              | 1                | 5                | 0                | -0.36                | -3.47                 |
| <b>b04</b>     | <chem>COc3c(O)c(C/C=C(C)\C)c2oc(c1cccc1)cc(=O)</chem><br><chem>c2c3O</chem> | 0                   | -1               | 100.0            | 1101.54             | 5.03               | 69.21                              | 2                | 5                | 0                | 0.65                 | -5.53                 |
| <b>b05</b>     | <chem>C/C(C)=C\Cc2c(O)cc(O)c3C(=O)C(O)C(c1ccc(O)cc1)Oc23</chem>             | 0                   | -1               | 77.03            | 320.64              | 0.27               | 107.35                             | 4                | 6                | 0                | -0.29                | -3.20                 |
| <b>b06</b>     | <chem>CC24Cc1c(O)ccc(O)c1C3OCC(O)(CCC2=O)C34</chem>                         | 0                   | -2               | 96.23            | 404.10              | 3.91               | 92.32                              | 3                | 5                | 0                | 0.29                 | -6.48                 |
| <b>b07</b>     | <chem>O=C/C=C/c1cccc1)OCC(O)COC(=O)/C=C/c</chem><br><chem>2ccccc2</chem>    | 0                   | -2               | 75.28            | 108.69              | 3.32               | 90.45                              | 1                | 5                | 0                | 0.08                 | -4.53                 |
| <b>b08</b>     | <chem>CC1C=CC(C)(CC(=O)O)C=C1</chem>                                        | 0                   | -1               | 85.35            | 347.02              | 2.53               | 46,80                              | 1                | 2                | 0                | -0.28                | -1.56                 |
| <b>b09</b>     | <chem>COc3cc(O)c2C(=O)C(OC)C(c1cc(O)c(OC)cc1O)Oc2c3</chem>                  | 0                   | -2               | 80,30            | 256,82              | 0.68               | 95.75                              | 3                | 6                | 0                | -0.28                | -5.77                 |
| <b>E-64</b>    |                                                                             | 1                   | -2               | 14.41            | 1.52                | -3.93              | 46.80                              | 7                | 10               | 1                | -1.31                | 0.16                  |

<sup>a</sup> Number of computed properties which fall outside the required range for 95% of known drug: 0 to 5;

<sup>b</sup> Central Nervous System Activity: -2 (inactive) to +2 (active);

<sup>c</sup> Human Oral Absorption (%): HOA >80% high and <25% poor;

<sup>d</sup> Apparent Permeability on Caco-2 cell membrane (Boehringer-Ingelheim scale for 95% of the drugs): <5 nm /s low and >500 nm /s, high;

<sup>e</sup> Logarithmic Partition Coefficient (*n*-octanol and water phases): -2 to 6.5;

<sup>f</sup> Van der Waals Surface Area of polar nitrogen and oxygen atoms: 7.0 to 200.0 Å<sup>2</sup>;

<sup>g</sup> Hydrogen bond Donor (number): 0 to 6;

<sup>h</sup> Hydrogen bond Acceptor (number): 2 to 20;

<sup>i</sup> Violations of Lipinski's 'Rule of Five' (RO5);

<sup>j</sup> Logarithmic Human Serum Albumin Binding: -1.5 to 1.5;

<sup>k</sup> Predicted IC<sub>50</sub> value for HERG K<sup>+</sup> channels blockage: below -5.

Table S2: Noncovalent interaction predictions for better SARS-CoV-2 Main protease complexescalculated from Protein-Ligand Interaction Profiler.

| PLIP Interactions |                          |              |                |                             |           |              |              |
|-------------------|--------------------------|--------------|----------------|-----------------------------|-----------|--------------|--------------|
| Compounds         | Hydrophobic Interactions | Distance (Å) | Hydrogen Bonds | Distance Donor-Acceptor (Å) | Angle (°) | Salt Bridges | Distance (Å) |
| (b01)             | Leu27                    | 3.84         | Gly143         | 2.78                        | 166.93    |              |              |
|                   |                          |              | Cys145         | 2.86                        | 134.14    |              |              |
| (b02)             | Asn142                   | 3.71         | Phe140         | 2.78                        | 145.72    |              |              |
|                   |                          |              | His163         | 2.8                         | 142.21    |              |              |
|                   |                          |              | Met165         | 4.04                        | 145.02    |              |              |
|                   |                          |              | Glu166         | 2.95                        | 166.16    |              |              |
|                   |                          |              | His41          | 3.94                        | 122.08    |              |              |
| RZS               | -                        | -            | Glu166         | 2.94                        | 170.4     |              |              |
| E-64              | Met49                    | 3.69         | Asn142         | 3.93                        | 118.92    | Glu166       | 4.37         |
|                   |                          |              | Asn142         | 2.91                        | 131.69    | Glu166       | 3.99         |
|                   |                          |              | Asn142         | 2.71                        | 143.03    |              |              |
|                   |                          |              | Glu166         | 2.85                        | 143.18    |              |              |
|                   |                          |              | Arg188         | 4.08                        | 147.4     |              |              |
|                   |                          |              | Gln189         | 2.67                        | 144.09    |              |              |
|                   |                          |              | Gln189         | 3.29                        | 100.56    |              |              |
|                   |                          |              | Thr190         | 3.34                        | 147.49    |              |              |
|                   |                          |              | Gln192         | 2.83                        | 127.77    |              |              |

Table S3: Molecular Surface Area and Hydrogen bond interactions with SARS-CoV-2 Main protease (**Mpro**) active site residues and best docked ligands from Natural Products Database of Bahia Semi-Arid region (NatProDB), **E-64** (positive control) and **RZS** (crystallographic ligand, PDB ID: [5R82](#)).

| Mpro subsites | Residue | holo Number | Area (A2) | Residue | E-64 Number | Area (A2) | Residue | b01 Number | Area (A2) | Residue | b02 Number | Area (A2) | Residue | b03 Number | Area (A2) | Residue | b04 Number |
|---------------|---------|-------------|-----------|---------|-------------|-----------|---------|------------|-----------|---------|------------|-----------|---------|------------|-----------|---------|------------|
| S1            | PHE     | 140         | 20.3      | HIS     | 41          | 27.0      | HIS     | 41         | 19.5      | HIS     | 41         | 22.1      | HIS     | 41         | 22.9      | HIS     | 41         |
|               | SER     | 144         | 5.2       | GLY     | 143         | 13.5      | SER     | 144        | 7.4       | GLY     | 143        | 13.8      | ASN     | 142        | 25.4      | LEU     | 141        |
|               | HIS     | 163         | 13.7      | SER     | 144         | 5.7       | CYS     | 145        | 17.6      | CYS     | 145        | 23.8      | GLY     | 143        | 19.3      | ASN     | 142        |
|               |         |             |           | CYS     | 145         | 21.0      | GLU     | 166        | 8.9       | GLU     | 166        | 19.3      | SER     | 144        | 5.0       | GLY     | 143        |
|               |         |             |           | GLU     | 166         | 21.2      |         |            |           |         |            |           | CYS     | 145        | 16.3      | SER     | 144        |
| S2            |         |             |           |         |             |           |         |            |           |         |            |           | HIS     | 164        | 10.4      | CYS     | 145        |
|               |         |             |           |         |             |           |         |            |           |         |            |           |         |            |           | GLU     | 166        |
|               | -       | -           | -         | MET     | 49          | 6.7       | MET     | 49         | 15.2      | MET     | 49         | 24.5      | ASP     | 48         | 9.3       | MET     | 49         |
|               | -       | -           | -         | MET     | 165         | 14.6      | MET     | 165        | 13.1      | MET     | 165        | 6.2       | MET     | 49         | 7.8       | MET     | 165        |
|               | -       | -           | -         | GLN     | 189         | 13.0      | GLN     | 189        | 9.1       | GLN     | 189        | 13.1      | MET     | 165        | 9.0       | GLN     | 189        |
| S1'           |         |             |           |         |             |           |         |            |           |         |            |           | ASP     | 187        | 6.7       |         |            |
|               |         |             |           |         |             |           |         |            |           |         |            |           | ARG     | 188        | 5.7       |         |            |
|               |         |             |           |         |             |           |         |            |           |         |            |           | GLN     | 189        | 22.5      |         |            |
| New           | -       | -           | -         | THR     | 25          | 21.8      | THR     | 25         | 18.3      | THR     | 25         | 13.8      | THR     | 25         | 16.0      | THR     | 25         |
|               | -       | -           | -         | THR     | 26          | 21.0      | THR     | 26         | 11.7      | THR     | 26         | 16.4      | THR     | 26         | 20.0      | LEU     | 27         |
|               | -       | -           | -         | LEU     | 27          | 17.9      | LEU     | 27         | 15.6      | LEU     | 27         | 16.5      | LEU     | 27         | 16.8      | -       | -          |
| New           | -       | -           | -         | CYS     | 44          | 7.0       | VAL     | 42         | 12.0      | SER     | 46         | 11.6      | CYS     | 44         | 15.6      | CYS     | 44         |
|               | -       | -           | -         | SER     | 46          | 14.2      | CYS     | 44         | 18.6      | TYR     | 118        | 6.3       | THR     | 45         | 6.7       | SER     | 46         |
|               | -       | -           | -         | ASN     | 119         | 9.1       | THR     | 45         | 11.4      | ASN     | 119        | 12.9      | SER     | 46         | 19.7      | LEU     | 50         |
|               |         |             |           |         |             |           | SER     | 46         | 17.6      |         |            |           | ASN     | 119        | 23.0      |         |            |

| Mpro subsites | holo   |           |                     | E-64   |          |                     | b01    |          |                     | b02    |          |                     | b03    |          |                     | b04    |          |                     | b05    |           |                     |
|---------------|--------|-----------|---------------------|--------|----------|---------------------|--------|----------|---------------------|--------|----------|---------------------|--------|----------|---------------------|--------|----------|---------------------|--------|-----------|---------------------|
|               | Don or | Accept or | Time Simulation (%) | Don or | Acceptor | Time Simulation (%) | Don or | Acceptor | Time Simulation (%) | Don or | Acceptor | Time Simulation (%) | Don or | Acceptor | Time Simulation (%) | Don or | Acceptor | Time Simulation (%) | Don or | Acceptor  | Time Simulation (%) |
| S1            |        |           |                     | H41    | O1       | 10.18               | S144   | O2       | 85.19               | H41    | O4       | 38.6                | G143   | O4       | 85.36               | N142   | O3       | 5.82                | S144   | O17       | 25.46               |
|               |        |           |                     | H41    | O5       | 9.98                | S144   | O1       | 84.69               | E166   | O4       | 34.94               | G143   | O3       | 47.25               | G143   | O4       | 63.39               | E166   | O19       | 7.32                |
|               |        |           |                     | E166   | O5       | 43.31               | C145   | O2       | 60.73               | O4     | E166     | 7.32                | S144   | O3       | 59.4                | S144   | O4       | 75.87               | Q189   | O20       | 89.85               |
|               |        |           |                     | N3     | E166 OE1 | 29.94               | C145   | O1       | 60.23               |        |          |                     | C145   | O3       | 72.21               | S144   | O5       | 90.85               | Q189   | O19       | 42.93               |
|               |        |           |                     | N3     | E166 OE2 | 75.05               |        |          |                     |        |          |                     | N1     | H164     | 97                  | C145   | O4       | 93.51               | O26    | HIS41O    | 71.38               |
|               |        |           |                     | N5     | G143     | 8.18                |        |          |                     |        |          |                     |        |          |                     | O2     | E166 OE1 | 47.75               | O17    | SER144O   | 5.32                |
|               |        |           |                     | N5     | E166 OE1 | 5.79                |        |          |                     |        |          |                     |        |          |                     | O2     | E166 OE2 | 53.24               | O18    | GLU166OE1 | 25.62               |

|                                                         |          |       |      |             |               |       |               |  |               |                |                |       |               |               |               |
|---------------------------------------------------------|----------|-------|------|-------------|---------------|-------|---------------|--|---------------|----------------|----------------|-------|---------------|---------------|---------------|
|                                                         |          |       |      | N5          | E166<br>OE2   | 29.54 |               |  |               | O5             | L141           | 14.31 | O1<br>8       | GLU16<br>6OE2 | 74.88         |
| S2                                                      |          |       |      | N1          | D187          | 5.39  |               |  | Q189<br>O5    | O5<br>Q18<br>9 | 11.48<br>45.26 |       |               |               |               |
|                                                         |          |       |      | N4          | THR<br>26O    | 24.75 |               |  | T25           | O2             | 5.82           |       | T2<br>5       | O26           | 61.4          |
| S1'                                                     |          |       |      | N5          | THR<br>26O    | 26.35 |               |  | T26           | O1             | 12.65          |       |               |               |               |
|                                                         |          |       |      |             |               |       |               |  | T26<br>O1     | O1<br>T26      | 18.97<br>11.31 |       |               |               |               |
|                                                         | Y11<br>8 | N2    | 15.1 | T190        | O4            | 68.46 |               |  | Y118          | O2             | 7.65           |       | S4<br>6       | O20           | 47.75         |
|                                                         | N1       | S121  | 6.5  | T190        | O3            | 62.08 |               |  | Y118          | O1             | 6.32           |       | O2<br>6       | C44           | 98.17         |
|                                                         |          |       |      | A191        | O4            | 72.85 |               |  | N119          | O1             | 32.11          |       |               |               |               |
|                                                         |          |       |      | A191        | O3            | 70.26 |               |  | O1            | N11<br>9       | 10.82          |       |               |               |               |
| New                                                     |          |       |      | Q192<br>N   | O4            | 59.28 |               |  |               |                |                |       |               |               |               |
|                                                         |          |       |      | Q192<br>N   | O3            | 61.08 |               |  |               |                |                |       |               |               |               |
|                                                         |          |       |      | Q192<br>NE2 | O4            | 50.3  |               |  |               |                |                |       |               |               |               |
|                                                         |          |       |      | Q192<br>NE2 | O3            | 45.51 |               |  |               |                |                |       |               |               |               |
|                                                         |          |       |      | N4          | N119          | 5.79  |               |  |               |                |                |       |               |               |               |
|                                                         |          |       |      | N5          | N119          | 20.76 |               |  |               |                |                |       |               |               |               |
| Hbnum <sub>1</sub>                                      |          | 0.5   |      |             | 8.4           |       | 3.2           |  | 3.2           |                | 3.8            |       | 6.3           |               | 5.8           |
| Hbond <sub>capac.</sub>                                 |          | 0.13  |      |             | 0.49          |       | 1.06          |  | 0.32          |                | 0.6            |       | 0.9           |               | 0.6           |
| Active Site<br>Volume<br>(Å <sup>3</sup> ) <sup>2</sup> |          | 430.6 |      |             | 461.8         |       | 349.6         |  | 303.9         |                | 329.0          |       | 262.9         |               | 319.7         |
| ΔE <sub>binding</sub><br>MM-PBSA <sup>3</sup>           |          | -     |      |             | -17.65 ± 0.07 |       | -12.51 ± 0.05 |  | -15.10 ± 0.04 |                | -19.15 ± 0.04  |       | -17.59 ± 0.14 |               | -16.35 ± 0.04 |

<sup>1</sup> See Materials and Methods for definition

<sup>2</sup>The active site volume was calculated from Fpocket module [77, 78] from MD productive phase.

<sup>3</sup> The MM-PBSA energies were calculated from *g\_mmpbsa* program [80, 81].
